# Supplementary material for: Biomimetic Stratum Corneum Liposome Models: Lamellar Organization and Permeability Studies
Source: MDPI journal article supplement (doi:10.3390/membranes13020135), 2023-01-20
Supplement: s1 [file s1]

## SUPPLEMENTARY INFORMATION

# Biomimetic Stratum Corneum Liposome Models: Lamellar Organization and Permeability Studies

Susmita Roy <sup>1</sup>, James C.S. Ho <sup>2</sup>, Douglas L.C. Teo <sup>1</sup>, Shikhar Gupta <sup>2,\*</sup> and Madhavan Nallani <sup>1,3,\*</sup>

<sup>1</sup> Center for Biomimetic Sensor Science, School of Materials Science and Engineering, Nanyang Technological University, Singapore 637553

<sup>2</sup> Procter & Gamble International Operations SA SG Branch, 138547, Singapore

<sup>3</sup> 3ACM Biolabs Pte Ltd, 71 Nanyang Drive, 638075, Singapore

\* Correspondence: SG, [s.gupta@pg.com](mailto:s.gupta@pg.com); MN, [mnallani@acmbiolabs.com](mailto:mnallani@acmbiolabs.com)

**The supplementary material contains the following:**  
**Figures S1-S2**  
**Table S1-S2**

### *FT-IR spectroscopy of stratum corneum lipid liposomes (SCLL)*

FTIR spectroscopy was performed to determine the lateral packing and conformational ordering of lipid matrix. The CH<sub>2</sub> symmetric and asymmetric stretching frequency of the hydrocarbon chains provides information on the conformational ordering of lipid tails. The low wavenumbers of the CH<sub>2</sub> symmetric (~2849 cm<sup>-1</sup>) and asymmetric (~2918 cm<sup>-1</sup>) vibrations indicate the presence of a highly ordered lipid organization (either hexagonal or orthorhombic). An increase in CH<sub>2</sub> stretching frequency represents the formation of a liquid disordered phase.

The CH<sub>2</sub> stretching vibrations of (both symmetric and asymmetric) CER:FFA: cholesterol:cholesteryl sulfate formulations are plotted in Fig. S1. The result shows that the SCLLs formulated with both saturated CERs (CER 3, CER 6) and FFAs chain have an initial CH<sub>2</sub> stretching between 2849.0 to 2850 cm<sup>-1</sup> (symmetric) and 2917 to 2819 cm<sup>-1</sup> (asymmetric) respectively. These values of CH<sub>2</sub> stretching are characteristic of tightly packed ordered chains conformation. The incorporation of unsaturated FFA (OA) in liposomal membrane increase CH<sub>2</sub> stretching frequency values to 2851 cm<sup>-1</sup> (symmetric) and 2820 cm<sup>-1</sup> (asymmetric), suggesting unsaturated fatty acid chain turns the lipid bilayer to a more disordered phase. The most remarkable change was observed in the Bovine CER formulation, where asymmetric stretching frequency shifts from 2917 to 2920 cm<sup>-1</sup> with changing FFA from saturated SA to unsaturated OA. Moreover, in CER 3B formulations, asymmetric stretching frequency increases to 1-2 cm<sup>-1</sup> compared to CER 3 formulations, for the same FFA. The result indicates that CER 3B makes bilayer more disordered due to the presence of unsaturation in CER acyl backbone. Thus, both CER acyl chain and FFA structure impact the conformation ordering of lipid matrix in SC bilayer.

**Citation:** Roy, S.; Ho, J.C.S.; Teo, D.L.C.; Gupta, S.; Nallani, M. Biomimetic Stratum Corneum Liposome Models: Lamellar Organization and Permeability Studies. *Membranes* **2023**, *13*, 135. <https://doi.org/10.3390/membranes13020135>

Academic Editor: Marija Raguž

Received: 22 December 2022

Revised: 18 January 2023

Accepted: 18 January 2023

Published: 20 January 2023

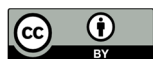

**Copyright:** © 2023 by the authors. Licensee MDPI, Basel, Switzerland. This article is an open access article distributed under the terms and conditions of the Creative Commons Attribution (CC BY) license (<https://creativecommons.org/licenses/by/4.0/>).

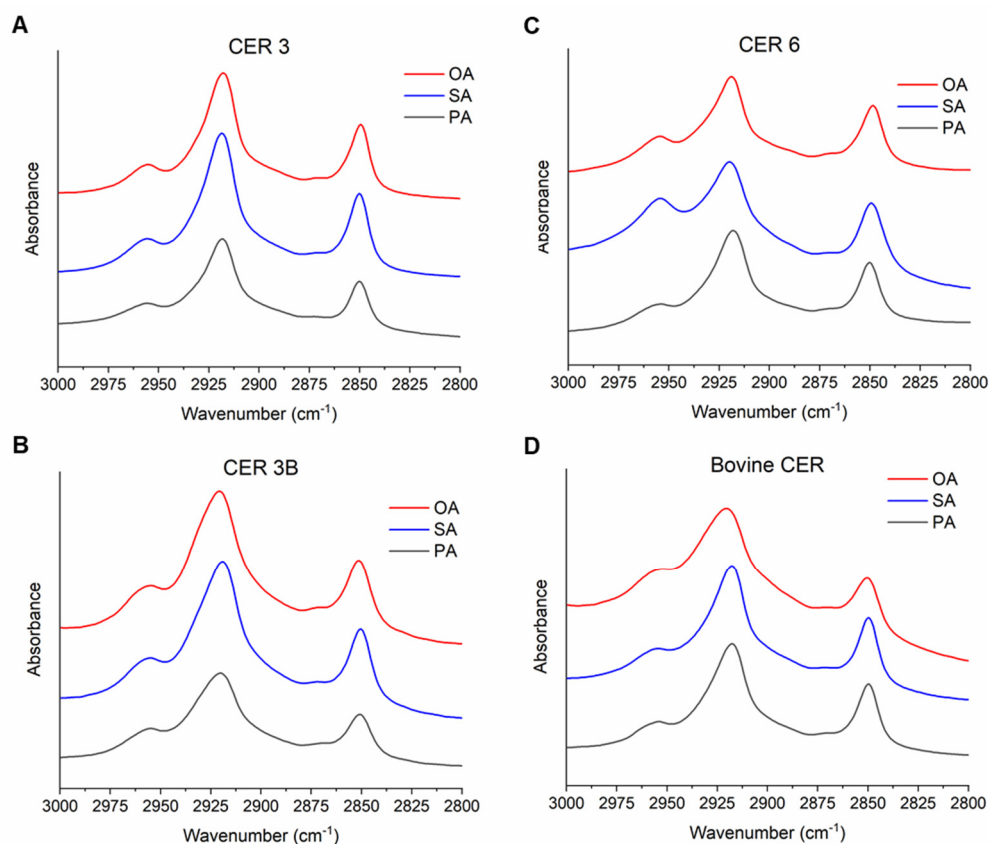

**Figure S1.** The FT-IR spectroscopy analyses of SCLs. Representative plots of (A) CER3-FFAs. (B) CER3B-FFAs. (C) CER6- FFAs. (D) Bovine CER-FFAs.

#### *Dynamic light scattering (DLS) measurement of SC lipid liposomes (SCLL)*

The 12 SCLLs were extruded and examined by dynamic light scattering (DLS). The hydrodynamic diameters, based on intensity distribution are comparable for all SCLLs, and fall between 120–170 nm (Fig. S2 and Table 1). The polydispersity indices (PDIs) vary between 0.01–0.14, suggesting that monodisperse SCLLs are formed.

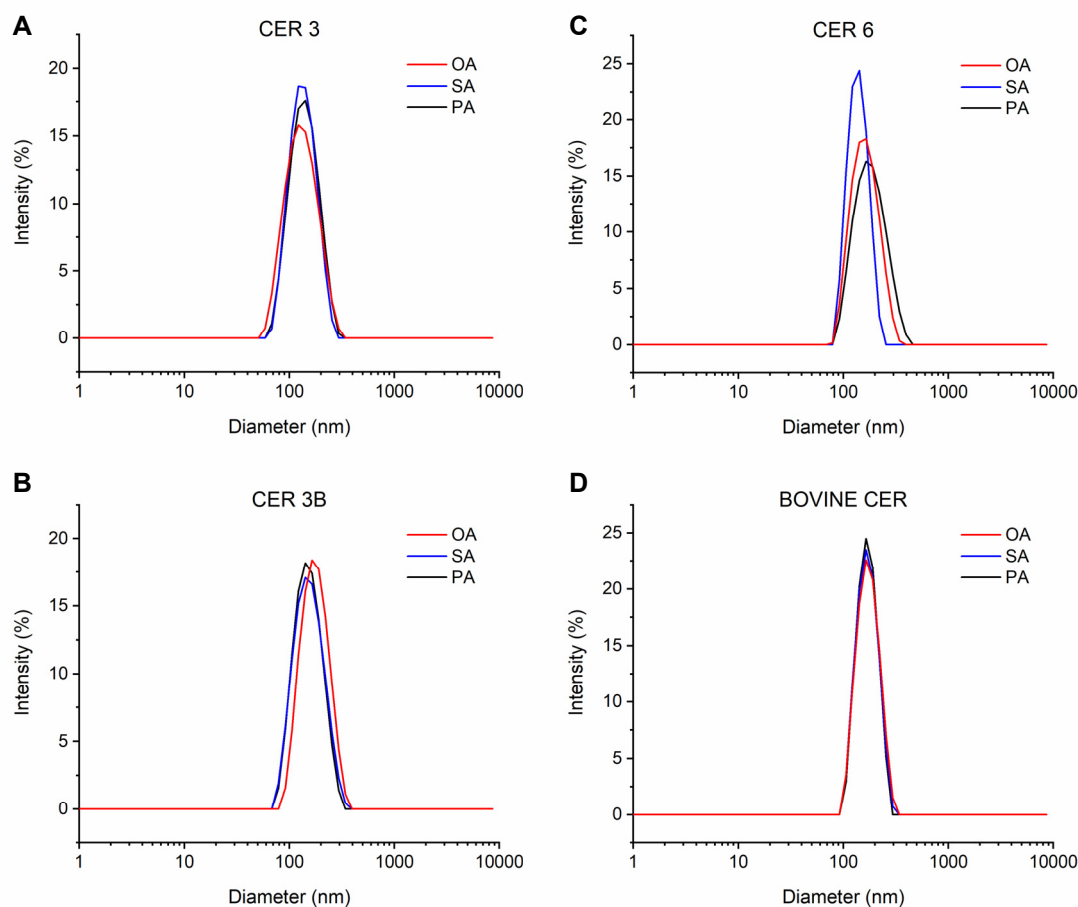

**Figure S2. Dynamic light scattering (DLS) measurements of extruded SCLL.** Intensity-weighted size distributions are shown for (A) CER3-FFAs, (B) CER3B-FFAs, (C) CER6-FFAs, and (D) Bovine CER-FFAs.

**Table S1. Comparison of lamellar phases observed for different lipid compositions.**

| No. | Lipid composition                                                                                                      | SPP (Å)                      | LPP (Å) | Others (Å)           | Ref.       |
|-----|------------------------------------------------------------------------------------------------------------------------|------------------------------|---------|----------------------|------------|
| 1.  | CER 3 (NP)<br>CER 3:FFA mixture:cholesterol (44:31:25, wt%)<br>FFA mixture = OA:LA:PA:MA:SA<br>(10.7:4.0:11.9:1.2:3.2) | 74.5                         | -       | -                    | [54]       |
| 2.  | CER 3:lignoceric acid:cholesterol (1:1:1, mol%) +<br>5mol% Cholesteryl Sulfate                                         | 52.4                         | -       | 42.5, 37.1           | [31]       |
| 3.  | CER 3:FFA:cholesterol:cholesterol sulfate<br>(40:25:25:10, mol%)<br>FFA = PA<br>FFA = SA<br>FFA = OA                   | 41.9, 48.3<br>  48.3<br>57.1 |         | 39.3<br>39.3<br>39.3 | This study |
|     | CER 6 (AP)                                                                                                             |                              |         |                      |            |

|     |                                                                                                                                                       |                                              |                         |                      |            |
|-----|-------------------------------------------------------------------------------------------------------------------------------------------------------|----------------------------------------------|-------------------------|----------------------|------------|
| 4.  | CER 6:PA:cholesterol:cholesteryl sulfate (55:15:25:5, mol%)                                                                                           | 46.0                                         | -                       | 42.1                 | [56]       |
| 5.  | CER 6:FFA:cholesterol:cholesteryl sulfate (40:25:25:10, mol%)<br>FFA = PA<br>FFA = SA<br>FFA = OA                                                     | 78.6 – 83.8<br>69.8, 44.9<br>68.0, 44.9      | -<br>-<br>-             | -<br>-<br>-          | This study |
| 6.  | Bovine CER (NS)<br>Bovine CER:FFA mixture:cholesterol (1:1:1, mol%)<br>FFA mixture = C16:C18:C20:C22:C24:C26 (1.3:3.3:6.7:41.7:5.4:36.8:4.7)          | 57.6, 51.8                                   | -                       | 33.5                 | [53]       |
| 7.  | Bovine CER:lignoceric acid:cholesterol (1:1:1, mol%) + 5mol% cholesterol sulfate                                                                      | 53.9                                         | -                       | 34.1 (c)             | [31,52]    |
| 8.  | Bovine CER(C24):FFA mixture:cholesterol (1:1:1, mol%)<br>FFA mixture = C16:C18:C20:C22:C24 (1.8:4.0:7.6:47.8:38.8, mol%)                              | 54.0                                         | 122                     | 33.8 (c)             | [55]       |
| 9.  | [CER EOS(C30):Bovine CER(C24)]:FFA mixture: cholesterol ([4:6]:1:1, mol%)<br>FFA mixture = C16:C18:C20:C22:C24 (1.8:4.0:7.6:47.8:38.8, mol%)          | -                                            | 125                     | 37                   | [58]       |
| 10. | Bovine CER:Cer EOS:lignoceric acid:cholesterol (0.7:0.3:1:1) + 5 wt% cholesterol sulfate                                                              | -                                            | 121.9                   | 34                   | [57]       |
| 11. | [CER 1:CER 3:Bovine CER (AS)]: FFA mixture: cholesterol ([1:7:2]: 1:1)<br>FFA mixture = C16:C18:C20:C22:C22:3:C24:C26 (1.3:3.3:6.7:41.7:5.4:36.8:4.7) | 57.1                                         | 128                     | 37.2                 | [27]       |
| 12. | Bovine CER:FFA:cholesterol:cholesterol sulfate (40:25:25:10, mol%)<br>FFA = PA<br>FFA = SA<br>FFA = OA                                                | -<br>-<br>-                                  | 125.7<br>125.7<br>139.6 | -<br>-<br>-          | This study |
| 13. | CER 3B<br>CER 3B:FFA:cholesterol:cholesterol sulfate (40:25:25:10, mol%)<br>FFA = PA<br>FFA = SA<br>FFA = OA                                          | 41.9, 57.1, 69.8<br>48.3, 62.8<br>52.4, 69.8 | -<br>-<br>-             | 39.3<br>39.3<br>39.3 | This study |

AS = CERs consisting of an  $\alpha$ -hydroxylated (A) fatty acid moiety and a sphingosine (S) moiety.

Table S2: Phase transitions detected in the DSC measurement of SCLs.

| Ceramides<br>T <sub>m</sub> (°C)                                      | PA                               |                                                                    | SA                               |                                                                       | OA                               |                                                                                  |
|-----------------------------------------------------------------------|----------------------------------|--------------------------------------------------------------------|----------------------------------|-----------------------------------------------------------------------|----------------------------------|----------------------------------------------------------------------------------|
|                                                                       | T <sub>m</sub> (°C)<br>ΔH (J/gm) | Phase Transi-<br>tion                                              | T <sub>m</sub> (°C)<br>ΔH (J/gm) | Phase Transi-<br>tion                                                 | T <sub>m</sub> (°C)<br>ΔH (J/gm) | Phase Transi-<br>tion                                                            |
| CER 3<br><br>T <sub>m</sub> (1):<br>126.4<br>T <sub>m</sub> (2): 30.8 | T <sub>m</sub> (1): 82.3         | liquid crystal-<br>line to H <sub>II</sub> phase                   | T <sub>m</sub> (1): 60.3         | Orthorhombic<br>to hexagonal I<br>packing to H <sub>II</sub><br>phase | T <sub>m</sub> (1): 77.2         | orthorhombic →<br>hexagonal →<br>liquid crystal-<br>line → H <sub>II</sub> phase |
|                                                                       |                                  |                                                                    | T <sub>m</sub> (2): 81.3         | gel → liquid<br>crystalline → H <sub>II</sub><br>phase                | T <sub>m</sub> (2): 101.0        | Further fluidiz-<br>ing transition                                               |
| CER 3B<br>T <sub>m</sub> : 100.9                                      | T <sub>m</sub> (1): 70.5         | Orthorhombic<br>to hexagonal<br>packing to hex-<br>agonal II phase | T <sub>m</sub> (1): 106.6        | Further fluidiz-<br>ing transition                                    | T <sub>m</sub> (1): 50           | orthorhombic to<br>hexagonal pack-<br>ing                                        |
|                                                                       | T <sub>m</sub> (2): 108.9        | Further fluidiz-<br>ing transition                                 |                                  |                                                                       | T <sub>m</sub> (2): 95.4         | Further fluidiz-<br>ing transition                                               |
| CER 6<br>T <sub>m</sub> : 100.3                                       | T <sub>m</sub> (1): 94.3         | liquid crystal-<br>line to H <sub>II</sub> phase                   | T <sub>m</sub> (1): 49.6         | orthorhombic to<br>hexagonal pack-<br>ing                             | T <sub>m</sub> (1): 70.0         | orthorhombic →<br>hexagonal →<br>liquid crystal-<br>line → H <sub>II</sub> phase |
|                                                                       | T <sub>m</sub> (2): 113.0        | Further fluidiz-<br>ing transition                                 | T <sub>m</sub> (2): 89.6         | gel → liquid<br>crystalline →<br>H <sub>II</sub> phase                | T <sub>m</sub> (2): 113.2        | Further fluidiz-<br>ing transition                                               |
| Bovine<br>CER<br>T <sub>m</sub> : 80.1                                | T <sub>m</sub> (1): 116.5        | fluidizing tran-<br>sition                                         | T <sub>m</sub> (1): 87.8         | Orthorhombic<br>to hexagonal I<br>packing to hex-<br>agonal II phase  | T <sub>m</sub> (1): 109.5        | fluidizing tran-<br>sition                                                       |
|                                                                       |                                  |                                                                    | T <sub>m</sub> (2): 111.4        | Further fluidiz-<br>ing transition                                    |                                  |                                                                                  |
